# Supplementary material
Source: publisher figshare collection journal article supplement (https://tandf.figshare.com/ndownloader/files/18544808)
Supplement: Supplementary file 1 [file 18544808]

| **Model** | **R2** | **RMSEP** | **BIAS** | **SD** | **IQ** | **RPD** | **RPIQ** |
| --- | --- | --- | --- | --- | --- | --- | --- |
| **Model 1 site-specific** | 0.95 | 1.8 | -0.12 | 8.53 | 9.55 | 4.74 | 5.31 |
| **Model 1 site-wise** | 0.78 | 2.82 | -0.83 | 1.17 | 1.33 | 2.00 | 0.47 |
| **Model 2 site-specific** | 0.82 | 0.64 | 0.24 | 1.17 | 1.33 | 1.83 | 2.08 |
| **Model 2 site-wise** | 0.9 | 7.13 | -4.13 | 8.53 | 9.55 | 1.20 | 1.34 |
| **Model 1.1 site-specific** | 0.95 | 1.81 | -0.25 | 8.53 | 9.55 | 4.71 | 5.28 |
| **Model 1.1 site-wise** | 0.78 | 2.83 | -0.34 | 1.17 | 1.33 | 0.41 | 0.47 |
| **Model 1.2 site-specific** | 0.94 | 2.05 | -0.14 | 8.53 | 9.55 | 4.16 | 4.66 |
| **Model 1.2 site-wise** | 0.77 | 2.14 | 0.05 | 1.17 | 1.33 | 0.55 | 0.62 |
| **Model 2.1 site- specific** | 0.67 | 1.56 | 0.35 | 1.17 | 1.33 | 0.75 | 0.85 |
| **Model 2.1 site- wise** | 0.94 | 2.01 | -0.64 | 8.53 | 9.55 | 4.24 | 4.75 |
| **Model 2.2 site-specific** | 0.7 | 1.25 | 0.03 | 1.17 | 1.33 | 0.94 | 1.06 |
| **Model 2.2 site-wise** | 0.95 | 2.03 | 0.06 | 8.53 | 9.55 | 4.20 | 4.70 |

Table A1: Independent validation models statistics.

Note that Models 1.1 and 2.1 were enlarged with a subset selected by Kennard-Stone algorithm and Models 1.2 and 2.2 with a subsets selecting samples according to their reference SOC value.
